# Supplementary material
Source: PubMed Central journal article supplement (PMC4105850)
Supplement: NIHMS598971-supplement-Supp_Material.pdf [file NIHMS598971-supplement-Supp_Material.pdf]

**Supp. Figure S1.** Pedigrees of the 12 families with autosomal recessive cutis laxa type 1 included in this study. Mutations are indicated. Square, male; round, female; Rhombus, unknown sex; Slash line, deceased, White symbol, healthy, no carrier; black symbol, affected; half-filled symbol, carrier, not affected; \*, DNA was available from this family member; double line, consanguinity, small symbol, foetus. Arrow, index patient.

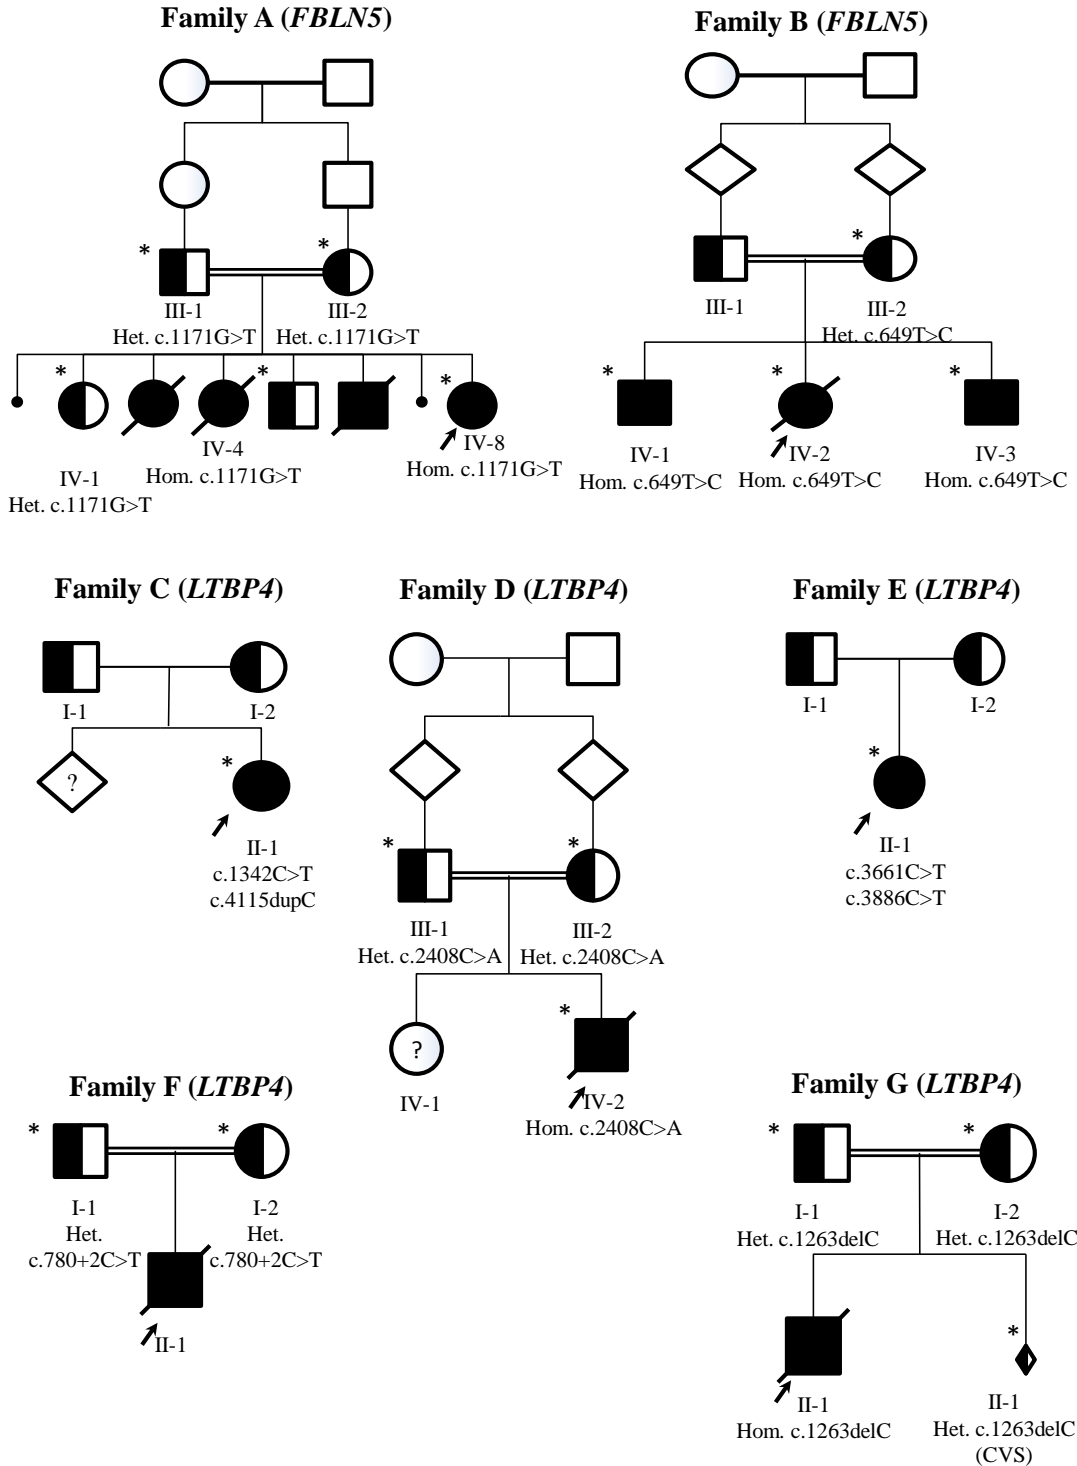

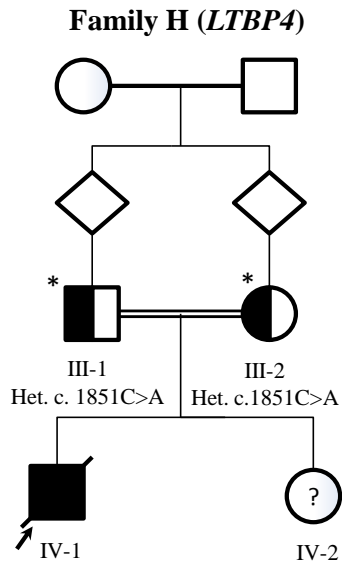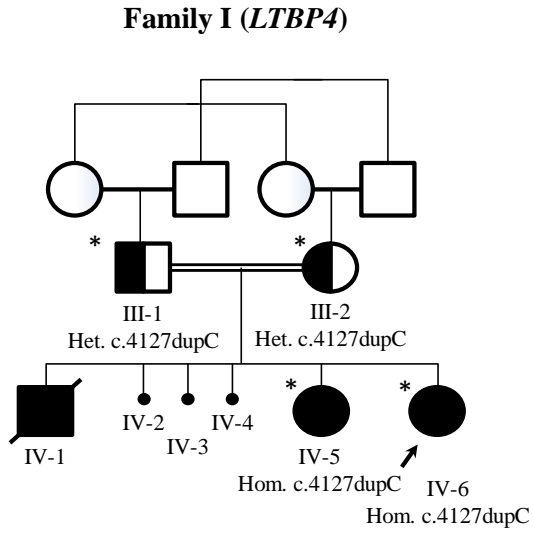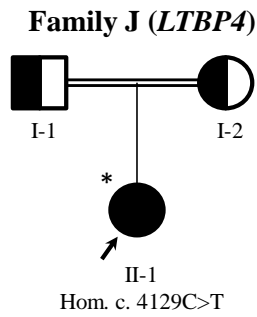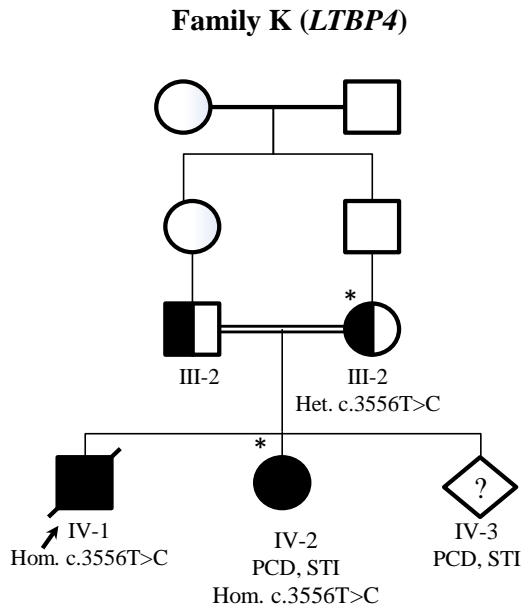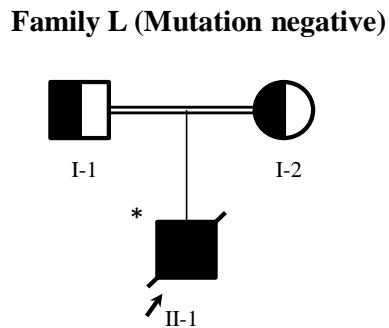

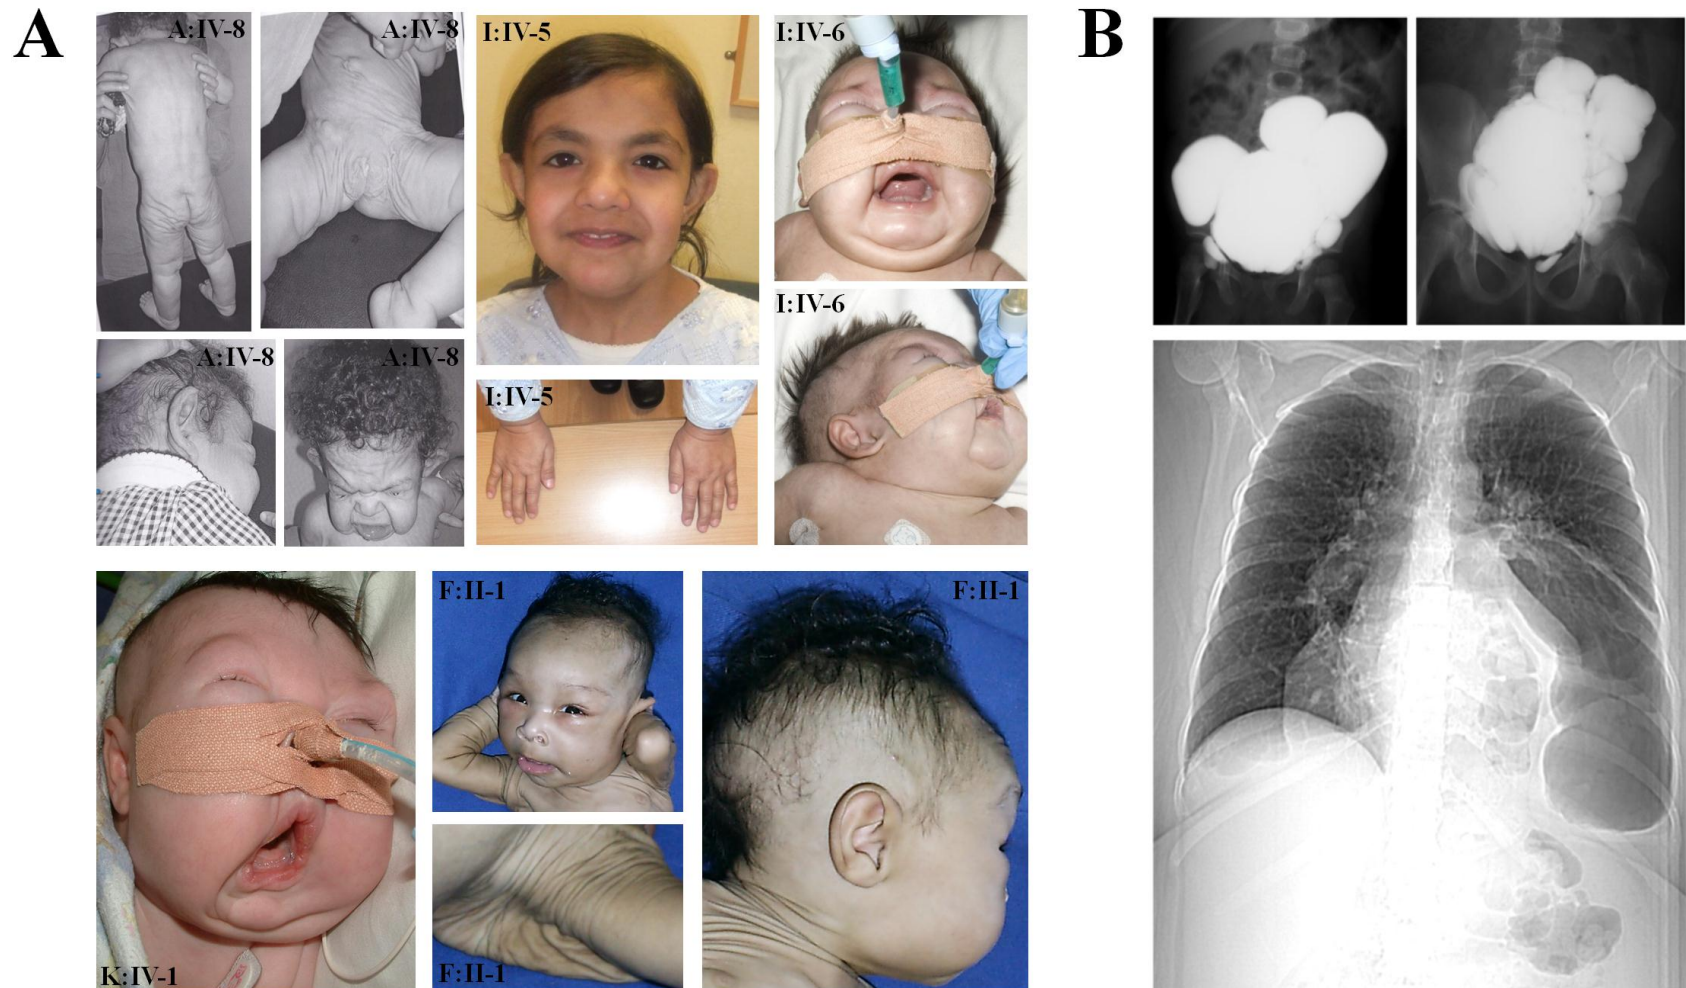

**Supp. Figure S2.** Clinical presentation of patients with *FBLN5* or *LTBP4* mutations. **A:** Clinical manifestations of patients with *FBLN5* or *LTBP4* mutations. Patient A:IV-8 with a homozygous *FBLN5* mutation presents with generalized cutis laxa, curly hair, a square face, large prominent ears, a broad forehead, Blepharochalasis and ptosis, sagging cheeks, and full lips. Patient I:IV-6 and F:II-1 with a homozygous *LTBP4* mutation showed generalized cutis laxa, sparse hair on the temporal sides, a sloping forehead, large ears, blepharochalasis and periorbital fullness, mild hypertelorism, a bulbous and beaked nose (with anteverted nostrils in F:II-1), a long philtrum, and a wrinkled skin on hands and feet. **B:** Internal manifestations in patient C:II-2 with *LTBP4* mutations included bladder diverticula, and diaphragmatic hernia.

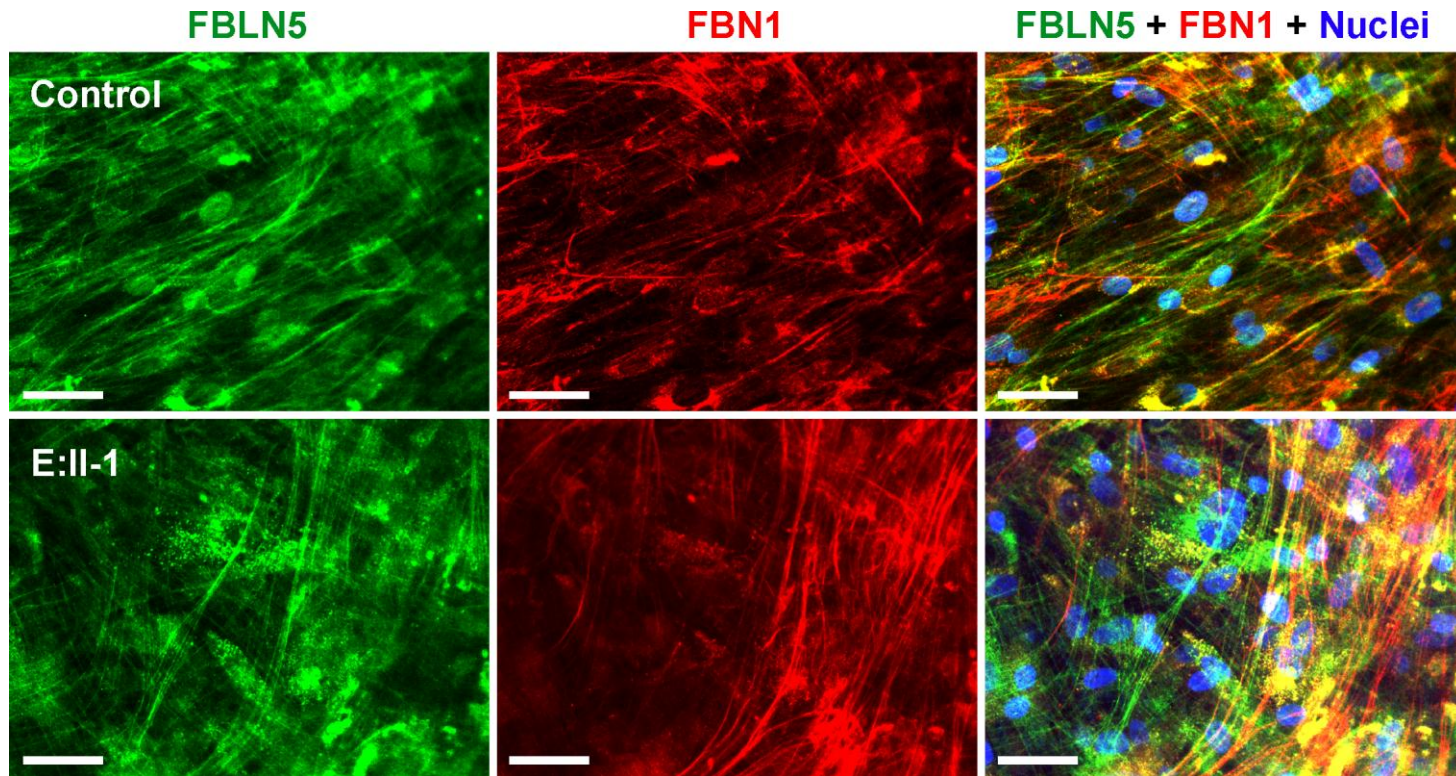

**Supp. Figure S3.** LTBP4 mutation does not affect fibulin-5 localization. The fibulin-5 (FBLN5; green) and fibrillin-1 (FBN-1; red) immunofluorescent staining of skin fibroblasts from control (A) and from LTBP4 mutant (patient E:II-1) individuals revealed similar fibulin-5 staining of the extracellular matrix. Magnification bar: 50  $\mu$ m.

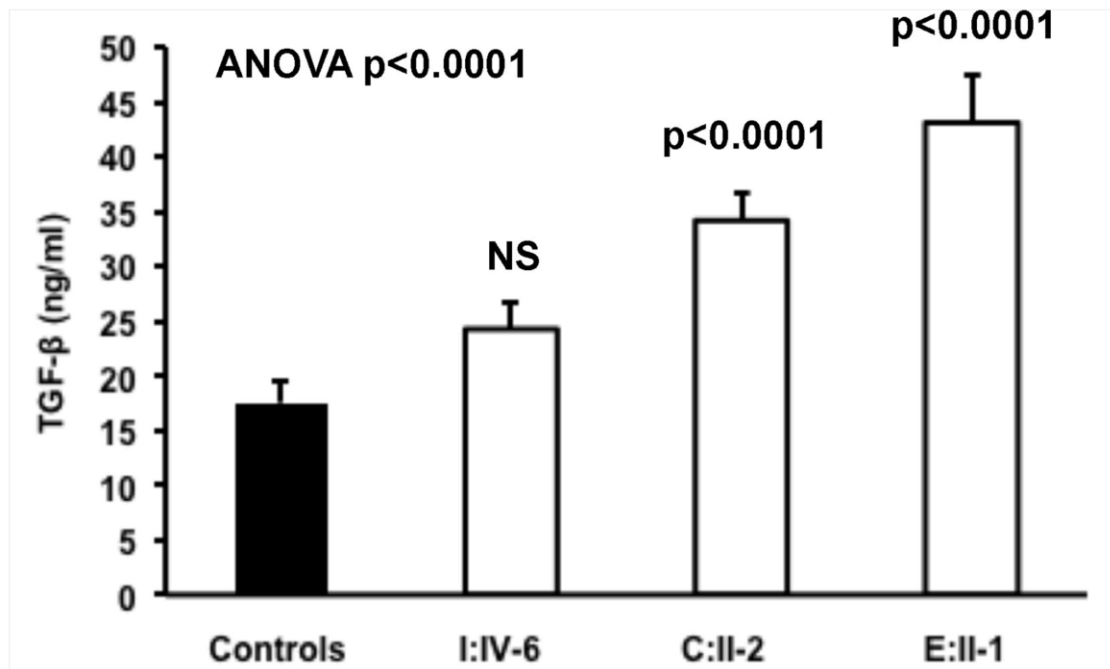

**Supp. Figure S4.** Measurements of TGFβ1 activity. TGFβ1 reporter cells are co-cultured with fibroblasts from patients C:II-2, E:II-1 and I:IV-6 and four controls (four replicates each). Error bars show standard errors of means and *p*-value (ANOVA) is significant among groups (Controls, Patients C:II-2, E:II-1 and I:IV-6). *P* values from pairwise comparisons between controls and each set of patient samples are shown above the bars. NS=not significant.

**Supp. Table S1. Antibodies used for immunoblotting and immunofluorescent staining**

| <b>Antibody</b>                                   | <b>Dilution</b> | <b>Source</b>            | <b>Application</b> | <b>Catalog Number</b> |
|---------------------------------------------------|-----------------|--------------------------|--------------------|-----------------------|
| <b>Mouse anti-human fibrillin-1 (monoclonal)</b>  | 1:500           | Chemicon                 | IF                 | MAB1919               |
| <b>Fibrillin-1(mAb69)</b>                         | 1:1000          | Dr. Lynn Y. Sakai        | IF                 | N/A                   |
| <b>Rabbit anti-human fibrillin-1 (polyclonal)</b> | 1:1000          | Dr. Robert Mecham        | IB                 | N/A                   |
| <b>Goat anti-human LTBP-4 (polyclonal)</b>        | 1:1000          | R&D Systems              | IB                 | AF2885                |
| <b>Goat anti-human LTBP-4 (polyclonal)</b>        | 1:500           | Santa Cruz Biotechnology | IB                 | SC-30359              |
| <b>Goat anti-human LTBP-4 (polyclonal)</b>        | 1:200           | R&D Systems              | IF                 | AF2885                |
| <b>Mouse anti-mouse LTBP-1 (polyclonal)</b>       | 1:100           | R&D Systems              | IF                 | AM388                 |
| <b>Rabbit anti-human fibulin-5 (polyclonal)</b>   | 1:200           | Dr. Elaine Davis         | IF                 | N/A                   |
| <b>Rabbit anti-human fibronectin (polyclonal)</b> | 1:1000          | Sigma                    | IF                 | 89062001              |
| <b>Goat anti-rabbit IgG-HRP</b>                   | 1:20000         | Thermo Scientific        | IB                 | PAI-29391             |
| <b>Donkey anti-goat IgG-HRP</b>                   | 1:2000          | Santa Cruz Biotechnology | IB                 | SC-2020               |
| <b>Donkey anti-mouse Alexa Fluor 594</b>          | 1:500           | Invitrogen               | IF                 | A21203                |
| <b>Donkey anti-goat Alexa Fluor 594</b>           | 1:250           | Invitrogen               | IF                 | A11058                |
| <b>Donkey anti-rabbit Alexa Fluor 488</b>         | 1:1000          | Invitrogen               | IF                 | A21206                |

IB: immunoblotting;

IF: immunofluorescence; HRP: horseradish peroxidase; N/A: not applicable

**Supp. Table S2. Clinical manifestations of probands included in the study**

| Individual                              | Age/<br>Sex | Cons.      | Fam.<br>hist. | Cause of<br>Death            | Skin       |            |            |            | Lungs      | Cardiovascular            |      |                      |                     |                                   | BD                           | GID        | Hypo-<br>tonia | Dysmorphism                                                                                                       | Other                                                                        |                  |
|-----------------------------------------|-------------|------------|---------------|------------------------------|------------|------------|------------|------------|------------|---------------------------|------|----------------------|---------------------|-----------------------------------|------------------------------|------------|----------------|-------------------------------------------------------------------------------------------------------------------|------------------------------------------------------------------------------|------------------|
|                                         |             |            |               |                              | CL         | FI         | IH         | DH         | PE         | PPAS                      | SVAS | Valvular<br>stenosis | Valvular<br>insuff. | other                             |                              |            |                |                                                                                                                   |                                                                              |                  |
| <b>FBLN5 MUTATION POSITIVE PROBANDS</b> |             |            |               |                              |            |            |            |            |            |                           |      |                      |                     |                                   |                              |            |                |                                                                                                                   |                                                                              |                  |
| A: II-8                                 | 19m/<br>F   | +          | + (1)         |                              | ++         | ++         | -          |            | +          |                           |      |                      |                     |                                   |                              |            | +              | frontal bossing, low and broad nasal bridge, beaked nose large dysplastic ears, sagging cheeks, everted lower lip | photophobia                                                                  |                  |
| B: IV-2                                 | 11m/<br>F   | +          | + (2)         | PE /<br>bronchiolitis        | ++         | ++         | +          |            | ++         | +                         |      |                      |                     | A                                 |                              |            |                |                                                                                                                   | pyloric stenosis                                                             |                  |
| <b>Summary<br/>FBLN5</b>                |             | <b>2/2</b> | <b>2/2</b>    | <b>1/2</b>                   | <b>2/2</b> | <b>2/2</b> | <b>1/2</b> | <b>0/2</b> | <b>2/2</b> | <b>1/2</b>                |      |                      |                     | <b>1/2</b>                        |                              | <b>0/2</b> |                | <b>1/2</b>                                                                                                        |                                                                              |                  |
| <b>LTBP4 MUTATION POSITIVE PROBANDS</b> |             |            |               |                              |            |            |            |            |            |                           |      |                      |                     |                                   |                              |            |                |                                                                                                                   |                                                                              |                  |
| C: II-2                                 | 23y/<br>F   | -          | + (3)         |                              | ++         | +/-        |            | +          | +/-        | +                         |      |                      |                     |                                   |                              |            | ++             | Large ears, beaked nose                                                                                           | Rectal prolapse, joint hypermobility, artificial bladder                     |                  |
| D:IV-2                                  | 4w/<br>M    | +          | +             | PE                           | +          | +          |            |            | ++         | ++                        |      |                      |                     |                                   |                              |            | +              |                                                                                                                   | prominent veins, bronchiomalacia, dilated pelvis of the left kidney          |                  |
| E: II-1                                 | 3m/<br>F    | -          | -             | bronchiolitis/<br>PE         | ++         | +          |            |            | +++        |                           |      |                      |                     |                                   |                              |            | +              | large ears, low nasal bridge                                                                                      | prominent veins                                                              |                  |
| F: II-1                                 | 2y/<br>M    | +          | -             | PE                           | +          | +/-        |            | +          | ++         | +                         |      |                      |                     |                                   |                              |            |                | +                                                                                                                 | frontal bossing                                                              | Thin hair growth |
| G: II-1                                 | 10y/<br>M   | +          | -             | PE                           | +          | +          | +          | +          | ++         |                           |      |                      |                     | M, T, A,<br>P<br>(dyspl-<br>prol) | atrial<br>septum<br>aneurysm |            | +              |                                                                                                                   | Rectal prolapse, abdominal wall herniae, prominent veins                     |                  |
| H: IV-1                                 | 6m/<br>M    | +          | -             | PHrT/PE                      | +          | +          |            |            | ++         | Systemic HrT, severe PHrT |      |                      |                     |                                   |                              |            |                |                                                                                                                   | Late onset GBS sepsis, unilateral pyelic dilatation                          |                  |
| I: IV-6                                 | 6m/<br>F    | +          | + (4)         | PHrT postop<br>gastric perf. | +          | +          |            | +          | +          | +                         |      | P, A<br>(dysplastic) | A                   | ASD,<br>PHrT                      |                              |            | +              | +                                                                                                                 | polyhydramnion, esophageal tortuosity, gastric perforation, tissue fragility |                  |

Supp. Table S2, continued

| Individual                       | Age/<br>Sex | Cons.        | Fam.<br>hist. | Cause of<br>Death  | Skin                   |              |             |                  | Lungs        | Cardiovascular |             |                      |                     |       | BD          | GID          | Hypo-<br>tonia | Dysmorphism | Other |                                                                                                                                                                             |                                                              |
|----------------------------------|-------------|--------------|---------------|--------------------|------------------------|--------------|-------------|------------------|--------------|----------------|-------------|----------------------|---------------------|-------|-------------|--------------|----------------|-------------|-------|-----------------------------------------------------------------------------------------------------------------------------------------------------------------------------|--------------------------------------------------------------|
|                                  |             |              |               |                    | CL                     | FI           | IH          | DH               | PE           | PPAS           | SVAS        | Valvular<br>stenosis | Valvular<br>insuff. | other |             |              |                |             |       |                                                                                                                                                                             |                                                              |
| J: II-1                          | 13y/<br>F   | +            | -             | brain<br>abscesses | +/-<br>(late<br>onset) | -            |             |                  | +/-          | ++             |             |                      |                     | T     |             | PHrT,<br>PFO | +              |             |       | prominent forehead,<br>blepharochalasis,<br>epicanthal folds, short<br>nose, elongated<br>marked philtrum, low<br>set large ears, webbed<br>neck, low posterior<br>hairline | Pelvic<br>insufficiency,<br>brain abscesses                  |
| K: IV-1                          | 6w/<br>M    | +            | + (5)         | PE                 | ++                     | +            |             | hiatus<br>hernia | ++           |                |             |                      |                     | T     |             | PHrT         | +              |             | +     | large ears, broad low<br>nasal bridge, frontal<br>bossing, small fontanel                                                                                                   | Hydronephrosis,<br>tracheomalacia,<br>joint<br>hypermobility |
| <b>Summary LTBP4</b>             |             | <b>7/9</b>   | <b>4/9</b>    | <b>8/9</b>         | <b>9/9</b>             | <b>8/9</b>   | <b>1/9</b>  | <b>5/9</b>       | <b>9/9</b>   | <b>5/9</b>     | <b>0/9</b>  | <b>1/9</b>           | <b>4/9</b>          |       | <b>5/9</b>  | <b>1/7</b>   | <b>4/9</b>     |             |       |                                                                                                                                                                             |                                                              |
| <b>MUTATION NEGATIVE PROBAND</b> |             |              |               |                    |                        |              |             |                  |              |                |             |                      |                     |       |             |              |                |             |       |                                                                                                                                                                             |                                                              |
| L: II-1                          | 6y/<br>M    | +            | -             |                    | +                      | +            | +           | -                |              |                |             | M                    |                     |       | +           | -            |                |             |       |                                                                                                                                                                             |                                                              |
| <b>Overall summary</b>           |             | <b>10/12</b> | <b>6/12</b>   | <b>9/12</b>        | <b>12/12</b>           | <b>11/12</b> | <b>3/12</b> | <b>5/12</b>      | <b>11/12</b> | <b>6/12</b>    | <b>0/12</b> | <b>2/12</b>          | <b>6/12</b>         |       | <b>5/12</b> | <b>1/12</b>  | <b>5/12</b>    |             |       |                                                                                                                                                                             |                                                              |

- (1) Two sisters and one brother with cutis laxa died, father has colitis ulcerosa, mother had 2 spontaneous abortions.
- (2) B: II-1, male 9 years old, generalized CL, inguinal hernias, emphysema probable, PPAS, aortic stenosis and insufficiency, Pyloric stenosis  
B:II-3, male, aged 4, generalized CL, inguinal herniae, mild emphysema, PPAS, aortic insufficiency, pyloric stenosis
- (3) One affected sib died at age 2
- (4) Mother had 3 spontaneous abortions.  
First child: male, generalized CL, died following a bowel rupture at day 5.  
Second child: female, generalized cutis laxa, failure to thrive, Bowel perforation (surgery), mitral valve prolapse, palpitations, syncopes, joint hypermobility. At 8 years of age: Nissen fundoplasty and placement of a gastrostomy for a volvulus through a massive hiatus herniae
- (5) Second child, female, generalized cutis laxa, died due to respiratory failure at 2 weeks of age. She also presented with primary ciliary dyskinesia and situs inversus totalis  
A third child had primary ciliary dyskinesia and situs inversus totalis without cutis laxa or emphysema.

## Abbreviations:

Cons., consanguinity; Fam. Hist., family history; CL, cutis laxa; FI, Facial involvement; IH, inguinal hernia; DH, diaphragmatic hernia; PE, pulmonary emphysema; PPAS, peripheral pulmonary artery stenosis; SVAS, supra-avalvular aortic stenosis; insuff., insufficiency; BD, bladder diverticula; GID, gastrointestinal diverticulae; M, male; F, female; y, year; m, months; w, weeks; M, mitral; T, tricuspid; A, aortic; P, pulmonary; ASD, atrium septum defect; PHrT, pulmonary hypertension; HrT, hypertension; PFO, patent foramen ovale



**Supp. Table S3. Differential diagnosis in type I recessive cutis laxa**

|                                                 | <b><i>FBLN4</i></b>                                           | <b><i>FBLN5</i></b>                                                         | <b><i>LTBP4</i></b>                                                     | <b><i>SLC2A10</i></b>                                                                                                |
|-------------------------------------------------|---------------------------------------------------------------|-----------------------------------------------------------------------------|-------------------------------------------------------------------------|----------------------------------------------------------------------------------------------------------------------|
| <b>Cutis laxa</b>                               | +                                                             | +++                                                                         | +++                                                                     | +                                                                                                                    |
|                                                 | (hyperextensible)                                             |                                                                             |                                                                         | (hyperextensible)                                                                                                    |
| <b>Dysmorphology</b>                            | High forehead<br>Hypertelorism<br>Marfanoid skeletal features | High forehead, broad and beaked nose, large dysplastic ears, sagging cheeks | Sparse hair on temporal sides, large forehead, large ears, long phitrum | Long face, Hypertelorism, Periorbital fullness, beaked nose, large ears, sagging cheeks, Marfanoid skeletal features |
| <b>Emphysema</b>                                | +                                                             | +++                                                                         | +++                                                                     | +                                                                                                                    |
| <b>Aortic root dilatation</b>                   | +++                                                           | -                                                                           | -                                                                       | +                                                                                                                    |
| <b>Arterial tortuosity</b>                      | ++                                                            | -                                                                           | -                                                                       | +++                                                                                                                  |
| <b>SVAS</b>                                     | -                                                             | +                                                                           | -                                                                       | -                                                                                                                    |
| <b>PPAS</b>                                     | +                                                             | +                                                                           | ++                                                                      | ++                                                                                                                   |
| <b>Valvular disease</b>                         | +                                                             | +                                                                           | +                                                                       | +                                                                                                                    |
| <b>Gastro-intestinal diverticula/tortuosity</b> | ?                                                             | +                                                                           | ++                                                                      | +                                                                                                                    |
| <b>Gastrointestinal fragility</b>               | -                                                             | -                                                                           | ++                                                                      | -                                                                                                                    |
| <b>Genitourinary diverticula</b>                | ?                                                             | +                                                                           | +++                                                                     | -                                                                                                                    |
| <b>Early mortality</b>                          | ++                                                            | +++                                                                         | +++                                                                     | +                                                                                                                    |

?, not known; +, feature with rare or mild occurrence, ++, frequent feature; +++, severe and frequent feature. Based on data in this study and the following papers: (Callewaert, et al., 2008; Huchtagowder, et al., 2006; Renard, et al., 2010; Urban, et al., 2009).

**Supp. References**

- Callewaert BL, Willaert A, Kerstjens-Frederikse WS, De Backer J, Devriendt K, Albrecht B, Ramos-Arroyo MA, Doco-Fenzy M, Hennekam RC, Pyeritz RE and others. 2008. Arterial tortuosity syndrome: clinical and molecular findings in 12 newly identified families. *Hum Mutat* 29(1):150-8.
- Hu Q, Loeys BL, Coucke PJ, De Paepe A, Mecham RP, Choi J, Davis EC, Urban Z. 2006. Fibulin-5 mutations: mechanisms of impaired elastic fiber formation in recessive cutis laxa. *Hum Mol Genet* 15(23):3379-86.
- Huchtagowder V, Sausgruber N, Kim KH, Angle B, Marmorstein LY, Urban Z. 2006. Fibulin-4: a novel gene for an autosomal recessive cutis laxa syndrome. *Am J Hum Genet* 78(6):1075-80.
- Renard M, Holm T, Veith R, Callewaert BL, Ades LC, Baspinar O, Pickart A, Dasouki M, Hoyer J, Rauch A and others. 2010. Altered TGFbeta signaling and cardiovascular manifestations in patients with autosomal recessive cutis laxa type I caused by fibulin-4 deficiency. *Eur J Hum Genet* 18(8):895-901.
- Urban Z, Huchtagowder V, Schurmann N, Todorovic V, Zilberberg L, Choi J, Sens C, Brown CW, Clark RD, Holland KE and others. 2009. Mutations in *LTBP4* cause a syndrome of impaired pulmonary, gastrointestinal, genitourinary, musculoskeletal, and dermal development. *Am J Hum Genet* 85(5):593-605.
